# Supplementary material
Source: PubMed Central journal article supplement (PMC7682567)
Supplement: pnas.2012480117.sapp.pdf [file pnas.2012480117.sapp.pdf]

# PNAS

[www.pnas.org](http://www.pnas.org)

Supplementary Information for

**CEACAMs serve as toxin-stimulated receptors for enterotoxigenic *E. coli***

Alaullah Sheikh<sup>1</sup>, Brunda Tumala<sup>1</sup>, Tim J. Vickers<sup>1</sup>, David Alvarado<sup>2</sup>, Matthew A. Ciorba<sup>2</sup>,  
Taufiqur Rhaman Bhuiyan<sup>4</sup>, Firdausi Qadri<sup>4</sup>, Bernhard B. Singer<sup>5</sup>, and James M.  
Fleckenstein<sup>1,3,6\*</sup>

corresponding

James M. Fleckenstein

Email: [jflecken@wustl.edu](mailto:jflecken@wustl.edu)

**This PDF file includes:**

Figures S1 to S7

Tables S1 to S7

SI References



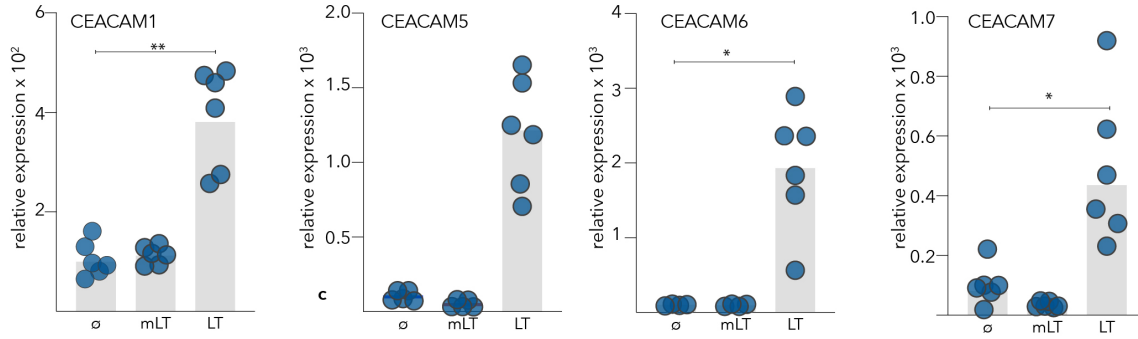

**Fig. S2.** heat-labile toxin induces transcription of genes encoding gastrointestinal CEACAMs. Shown are RT-PCR data demonstrating induction of CEACAM gene transcription following exposure of Caco-2 cells to heat-labile toxin (LT) relative to cells treated with inactive E112K mutant LT (mLT), or untreated cells ( $\emptyset$ ). Data include total of 5-6 technical replicates combined from two experiments. Bars represent geographic means. (\*= $<0.05$ , and \*\*= $<0.01$  by nonparametric ANOVA comparisons (Kruskal-Wallis)).

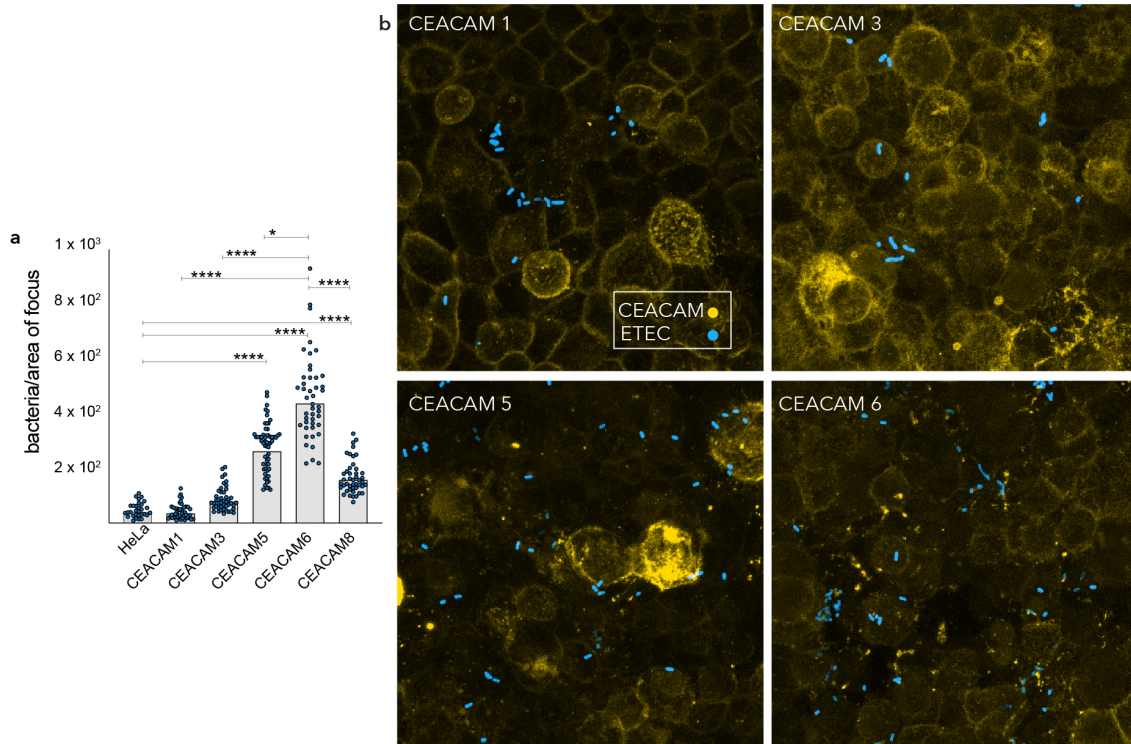

**Fig S3.** Preferential binding of ETEC to select CEACAMs.

**a.** ETEC H10407 adhesion to HeLa cells or HeLa cells expressing recombinant human CEACAMs. Data represent combined observations from n=3 experimental replicates. P values in a, b determined by ANOVA Kruskal-Wallis comparison of nonparametric data: \*\*\*\* <0.0001, \*<0.05. Bars in a represent geographic means.

**b.** images depict representative CEACAM expression (pseudo-colored yellow) detected with specific monoclonal antibodies directed against each molecule followed by goat anti-mouse AlexaFluor 594 conjugate, binding of bacteria (detected with anti-O78 rabbit polyclonal antibody, and goat anti-rabbit AlexaFluor 488 conjugate, pseudo-colored blue).

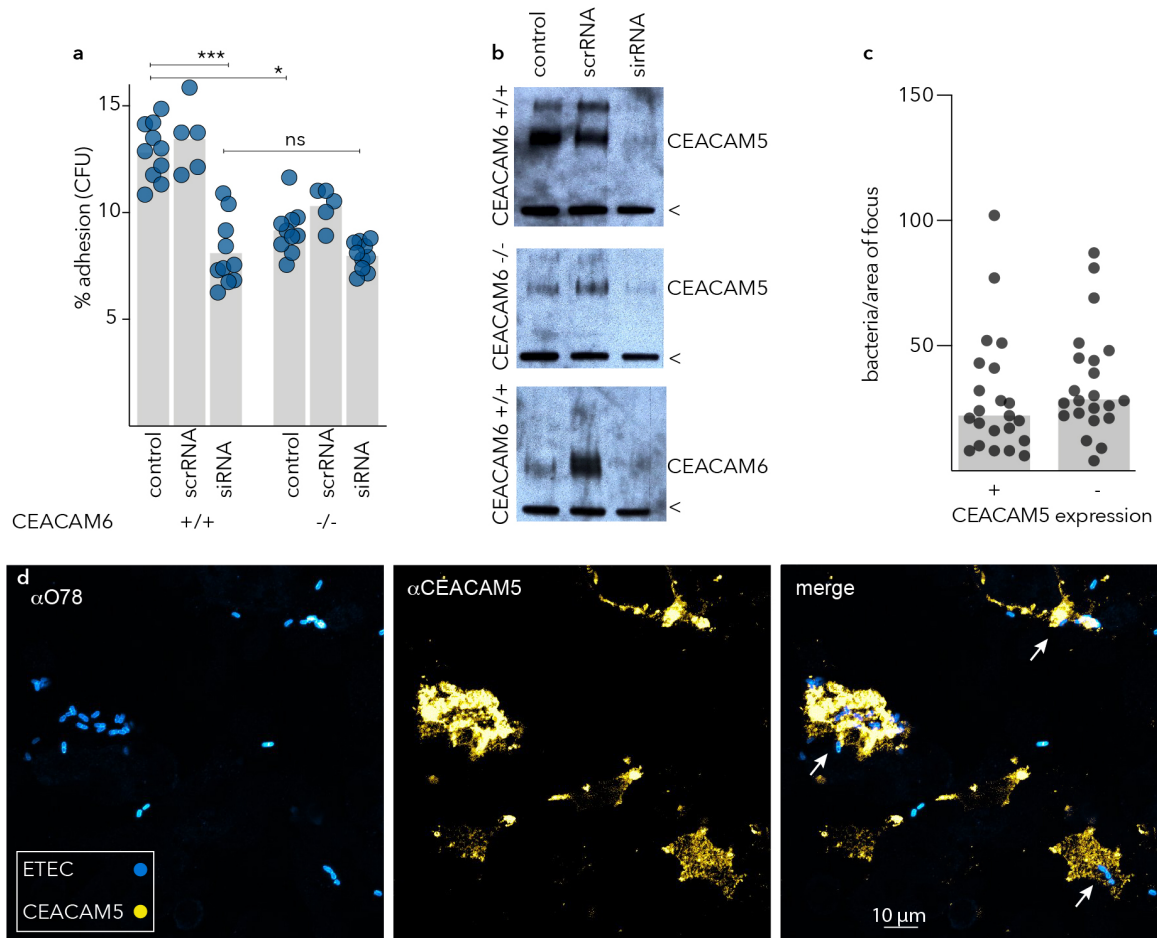

**Fig S4.** ETEC interactions with CEACAM5 expressed by Caco-2 cells. **a.,b** . impact of CEACAM5 siRNA knockdown on bacterial adhesion (**a**) and CEACAM5 and CEACAM6 expression in Caco-2 cells (**b**). (\*\**p*=0.0001, \**p*<0.05 by ANOVA, Kruskal-Wallis) Bars represent geographic means. Arrows (<) indicate tubulin as a loading control. Control, and scrRNA in a and b represent Lipofectamine transfection reagent alone and transfection with negative control siRNA, respectively. **c.** distribution of wild type ETEC (H10407) bacteria in areas exhibiting high or low CEACAM5 expression by confocal microscopy **d.** confocal images of ETEC, detected with anti-O78 antibody, in areas of robust CEACAM5 expression on Caco-2 cells.

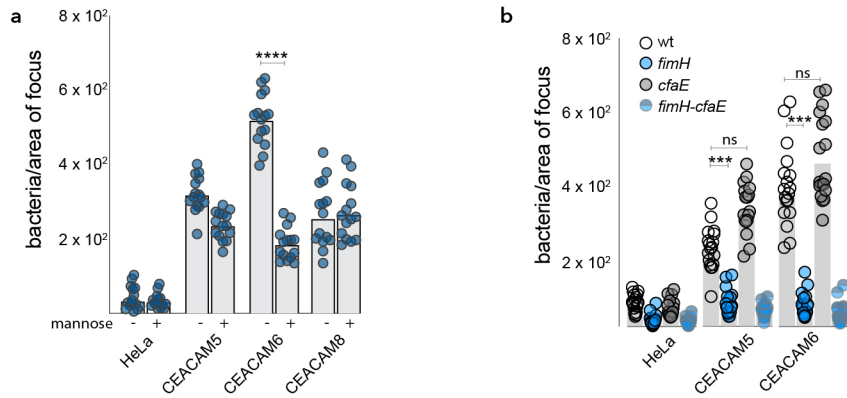

**Fig S5.** ETEC interaction with CEACAM6 depends on the mannose sensitive adhesin FimH. **a.** CEACAM6 interaction is inhibited by mannose. **b.** H10407-CEACAM interaction requires functional type 1 fimbriae, but does not rely on canonical CFA/I fimbriae. Graph depicts binding of wild type, *fimH* mutant, *cfaE* mutant, and *fimH/cfaE* mutant strains to HeLa cells expressing CEACAMs 5, or 6 compared to control HeLa cells. \*\*\* represents  $p \leq 0.001$ , and \*\*\*\*  $< 0.0001$  by ANOVA Kruskal-Wallis comparison of nonparametric data. Bars represent geographic means.

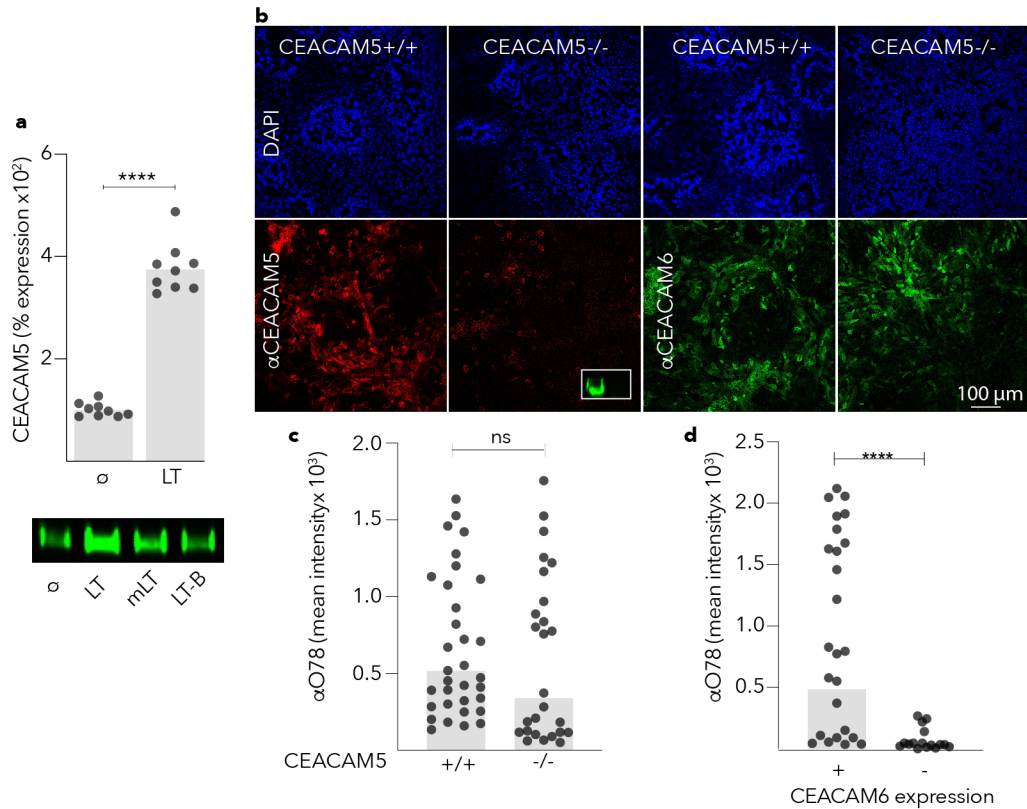

**Fig S6.** ETEC interaction with CEACAM5 expressed on small intestinal epithelia. **a.** RT-PCR data demonstrating increased expression of CEACAM5 in small intestinal enteroid cells following heat-labile toxin treatment (LT) relative to untreated cells (ø). a-CEACAM5 immunoblot below shows relative expression of CEACAM5 following treatment with LT, mLT (E112K), or LT-B subunit alone. **b.** CEACAM expression in CRISPR/Cas9-generated CEACAM5<sup>-/-</sup> ileal enteroid line. Confocal images showing CEACAM5 (red) and CEACAM6 (green) expression in wild type and CEACAM5<sup>-/-</sup> knockout cells. Inset immunoblot also demonstrates lack of CEACAM5 production in CEACAM5<sup>-/-</sup> knockout cells relative to parental cell line. **c.** ETEC adhesion, detected by anti-O78 signal, to wild type and CEACA5<sup>-/-</sup> knockout cells. Bars represent geometric means, ns= not significant, **d.** CEACAM6 directs bacterial association on CEACAM5<sup>-/-</sup> cells. Bars represent geometric means and \*\*\*\* represents p<0.00001. Data were generated from at least 3 individual experiments, and p values were calculated using nonparametric Mann-Whitney test. Bars throughout represent geographic means.

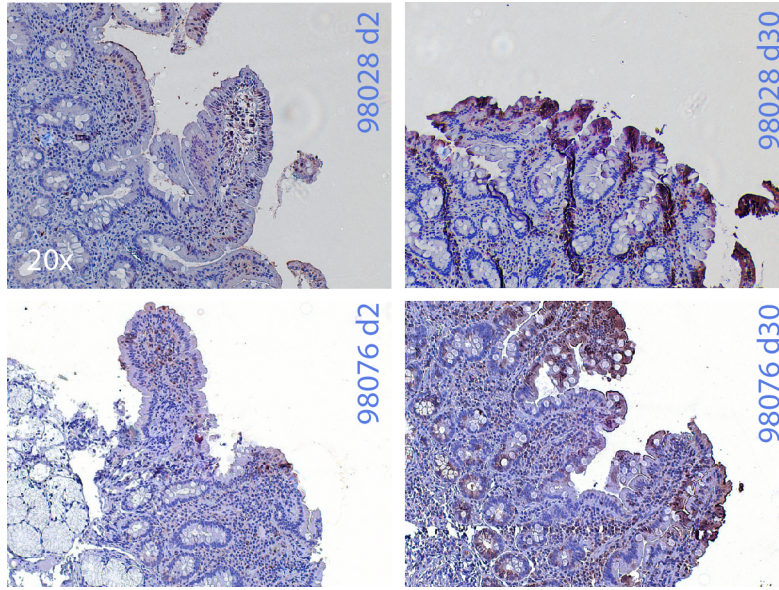

**Fig S7.** serial small intestinal biopsies from two ETEC-infected patients obtained on day 2 of hospitalization at icddr and day 30 post presentation.



**Table S1.** gastrointestinal CEACAMS

| Antigen | other designation(s) | ncbi gene number     | domains                                                                                                                  | membrane anchor | tissue expression                                  | references |
|---------|----------------------|----------------------|--------------------------------------------------------------------------------------------------------------------------|-----------------|----------------------------------------------------|------------|
| CEACAM1 | BGP, CD66            | <a href="#">634</a>  | <a href="#">cd05774</a><br>Ig_CEACAM_D1<br><a href="#">smart00410</a> Ig-like                                            | TM              | colon, small intestine, marrow/ WBCs               | (1, 2)     |
| CEACAM5 | CEA, CD66e           | <a href="#">1048</a> | <a href="#">cd05774</a><br>Ig_CEACAM_D1<br><a href="#">smart00410</a> Ig-like<br><a href="#">cd05740</a><br>Ig_CEACAM_D4 | GPI             | colon, small intestine                             | (2)        |
| CEACAM6 | NCA, CD66c           | <a href="#">4680</a> | <a href="#">cd05774</a><br>Ig_CEACAM_D1<br><a href="#">smart00410</a> Ig-like                                            | GPI             | colon, lung, small intestine, marrow/WBCs, bladder | (2, 3)     |
| CEACAM7 |                      | <a href="#">1087</a> | <a href="#">cd05774</a><br>Ig_CEACAM_D1<br><a href="#">smart00410</a> Ig-like                                            | GPI             | colon                                              | (2)        |

TM=transmembrane; GPI=glycosylphosphatidylinositol; WBCs=white blood cells

**Table S2. bacterial strains and plasmids**

| Bacterial strains and plasmids used in these studies                                                                                                                                                                                     |                                                                                                                                                                                                                                         |                                                                                                                                                             |
|------------------------------------------------------------------------------------------------------------------------------------------------------------------------------------------------------------------------------------------|-----------------------------------------------------------------------------------------------------------------------------------------------------------------------------------------------------------------------------------------|-------------------------------------------------------------------------------------------------------------------------------------------------------------|
| designation                                                                                                                                                                                                                              | Description                                                                                                                                                                                                                             | Source/Reference(s)                                                                                                                                         |
| <b>Strain</b>                                                                                                                                                                                                                            |                                                                                                                                                                                                                                         |                                                                                                                                                             |
| H10407                                                                                                                                                                                                                                   | Wild-type ETEC strain O78:H11;CFA/1;LT+/ST+;EtpA+                                                                                                                                                                                       | (4, 5)                                                                                                                                                      |
| jf570                                                                                                                                                                                                                                    | <i>eltA</i> ::FRT <sup>a</sup> , antibiotic sensitive                                                                                                                                                                                   | (6)                                                                                                                                                         |
| jf2944                                                                                                                                                                                                                                   | <i>fimH</i> ::Km <sup>R</sup> , <i>fimH</i> gene is replaced with kanamycin resistant cassette                                                                                                                                          | 27                                                                                                                                                          |
| jf1862                                                                                                                                                                                                                                   | <i>cfaE</i> ::Km <sup>R</sup> <i>cfaE</i> gene replaced with kanamycin resistant cassette                                                                                                                                               | 27                                                                                                                                                          |
| jf2945                                                                                                                                                                                                                                   | <i>fimH</i> :: Cm <sup>R</sup> , <i>cfaE</i> ::Km <sup>R</sup> <i>fimH-cfaE</i> double mutants; <i>fimH</i> gene is replaced with chloramphenicol resistant cassette and <i>cfaE</i> gene is replaced with kanamycin resistant cassette | 27                                                                                                                                                          |
| Stbl3                                                                                                                                                                                                                                    | <i>F-mcrB mrrhsdS20(r<sub>B</sub>, m<sub>B</sub>) recA13 supE44 ara-14 galK2 lacY1 proA2 rpsL20(Str<sup>R</sup>) xyl-5 λ'leumtl-1</i>                                                                                                   | ThermoFisher                                                                                                                                                |
| <b>plasmid</b>                                                                                                                                                                                                                           |                                                                                                                                                                                                                                         |                                                                                                                                                             |
| pRC202454                                                                                                                                                                                                                                | CEACAM6 expression plasmid; CMV promoter; Neo <sup>R</sup> /Km <sup>R</sup>                                                                                                                                                             | OriGene                                                                                                                                                     |
| pcDNA3.4_mlgG2-mMxr8a                                                                                                                                                                                                                    | expression plasmid containing IL-2 signal peptide and C-terminal 6His tag Amp <sup>R</sup> /Neo <sup>R</sup> /                                                                                                                          | Diamond lab (7)                                                                                                                                             |
| pcDNA3.4_CEACAM6-His                                                                                                                                                                                                                     | 858 bp CEACAM6 sequence amplified from pRC202454 with primers jf030218.1/1.3 cloned by Gibson assembly into pcDNA3.4_mlg2-mMxr8a digested with <i>EcoRI/AgeI</i>                                                                        | this study//addgene <a href="#">149337</a>                                                                                                                  |
| pFCIV                                                                                                                                                                                                                                    | lentiviral packaging vector YFP; Amp <sup>R</sup> , Bleo <sup>R</sup> ; ColE1ori;                                                                                                                                                       | hope center for neurological disorders<br><a href="https://hopecenter.wustl.edu/?page_id=7068">https://hopecenter.wustl.edu/?page_id=7068</a><br>PMC5008082 |
| pFCIV-CEACAM6                                                                                                                                                                                                                            | 1035bp CEACAM6 insert amplified from pRC202454 using primers jf021518.1/1.2 and cloned into BamHI and AgeI sites of pFCIV by Gibson assembly                                                                                            | this study/addgene <a href="#">149303</a>                                                                                                                   |
| psPAX2                                                                                                                                                                                                                                   | 2 <sup>nd</sup> generation lentiviral packaging plasmid (Addgene#12260)                                                                                                                                                                 | Addgene                                                                                                                                                     |
| pMD2.G                                                                                                                                                                                                                                   | VSV-G envelope expressing plasmid for lentiviral packaging (Addgene #12259)                                                                                                                                                             | Addgene                                                                                                                                                     |
| plentiCRISPRv2 <sup>b</sup>                                                                                                                                                                                                              | Cas9 guide RNA plasmid addgene <a href="#">52961</a> , Amp <sup>R</sup>                                                                                                                                                                 | (8)                                                                                                                                                         |
| pCEACAM5gRNA                                                                                                                                                                                                                             | CEACAM5 guide RNA introduced into plentiCRISPRv2 at <i>BsmBI</i> sites by Gibson assembly                                                                                                                                               | this study                                                                                                                                                  |
| pfimHLD-his                                                                                                                                                                                                                              | Expression of FimH lectin domain                                                                                                                                                                                                        | (9)                                                                                                                                                         |
| pfimHLD:Q133K-his                                                                                                                                                                                                                        | Expression of Q133K mutated FimH lectin domain                                                                                                                                                                                          | (9)                                                                                                                                                         |
| <sup>a</sup> FRT=FLP recombinase recognition target.<br><sup>b</sup> lentiCRISPR v2 was a gift from Feng Zhang (Addgene plasmid # 52961 ; <a href="http://n2t.net/addgene:52961">http://n2t.net/addgene:52961</a> ; RRID:Addgene_52961). |                                                                                                                                                                                                                                         |                                                                                                                                                             |

**Table S3.** cell lines

| Cell line        | Description                                                                                                 | Source                  |
|------------------|-------------------------------------------------------------------------------------------------------------|-------------------------|
| Caco-2           | Colonic epithelial cells                                                                                    | ATCC HTB-37             |
| G2 (CEACAM6 -/-) | CRISPR-Cas9-generated CEACAM6-negative Caco-2 cells                                                         | This study              |
| G2-CEACAM6       | CEACAM6 trans-complemented G2 cells                                                                         | This study              |
| HeLa             | Cervical epithelial cells                                                                                   | ATCC CCL-2              |
| HeLa-GFP-CEACAM6 | CEACAM6-expressing GFP positive HeLa cells                                                                  | This study              |
| HeLa_CEACAM1     | Stably transfected HeLa cells expressing CEACAM1                                                            | (10)                    |
| HeLa_CEACAM3     | Stably transfected HeLa cells expressing CEACAM3                                                            | (10)                    |
| HeLa_CEACAM5     | Stably transfected HeLa cells expressing CEACAM5                                                            | (10)                    |
| HeLa_CEACAM6     | Stably transfected HeLa cells expressing CEACAM6                                                            | (10)                    |
| HeLa_CEACAM8     | Stably transfected HeLa cells expressing CEACAM8                                                            | (10)                    |
| Expi293F         | Human embryonic Kidney cells                                                                                | Thermo Fisher<br>A14527 |
| HEK293T          | Derivative of human embryonic kidney 293 cells suitable for high titer lentivirus production, ATCC CRL-3216 | ATCC                    |
| CEACAM5-/-       | CRISPR-Cas9-generated CEACAM5-negative human small intestinal enteroid cell line                            | This study              |
| Hu135D           | human small intestinal (ileal) enteroid, blood group A                                                      | (11)                    |
| Hu235D           | human small intestinal (ileal) enteroid, blood group O                                                      | (11)                    |
| Hu248D           | human small intestinal (ileal) enteroid, blood group B                                                      | (11)                    |

**Table S4. primers**

| <b>primers used in these studies</b> |                                                           |                             |                       |                        |               |  |
|--------------------------------------|-----------------------------------------------------------|-----------------------------|-----------------------|------------------------|---------------|--|
| <b>cloning primers</b>               |                                                           |                             |                       |                        |               |  |
| primer name                          | sequence 5'-3'                                            |                             |                       |                        |               |  |
| f021518.1                            | tgggctgcaggtcgactctagaggatccATGGGACCCCCCTCAGCCCCCTCCCTGCA |                             |                       |                        |               |  |
| jf021518.2                           | ggggagggagagggcgatcaccggtTTATATCAGAGCCACCCTGGCCA          |                             |                       |                        |               |  |
| jf030218.1                           | TAAGTCTTGCACTTGTCACGAATTCGATATCGAAGCTCACTATTGAATCCACG     |                             |                       |                        |               |  |
| jf030218.3                           | CTCAATGGTGATGGTGATGATGACCGGTTGCAGAGACTGTGATCATCGTG        |                             |                       |                        |               |  |
| <b>RT-PCR primers</b>                |                                                           |                             |                       |                        |               |  |
| gene name                            | Entrez gene ID <sup>1</sup>                               | Primer Bank ID <sup>2</sup> | forward primer        | reverse primer         | amplicon (bp) |  |
| CEACAM1                              | <a href="#">634</a>                                       | 329112546c1                 | TGCTCTGATAGCAGTAGCCCT | TGCCGGTCTTCCCGAAATG    | 53            |  |
| CEACAM5                              | <a href="#">1048</a>                                      | 98986444c2                  | TCTTGGCTGATTGATGGGAAC | CACTGGCTGAGTTATTGGCCT  | 112           |  |
| CEACAM6                              | <a href="#">4680</a>                                      | PMID: 18223215              | CACCGTCGGCATCACGA     | GAAGAATTCAGGGTCTGGTCCA | 113           |  |
| CEACAM7                              | <a href="#">1087</a>                                      | 257153399c3                 | CTCAATCCGGTGGAGAACA   | CGCTGAGTAGAACGAGGGTC   | 155           |  |
| GAPDH                                | <a href="#">2597</a>                                      | PMID: 28885617              | CTCAATCCGGTGGAGAACA   | CGCTGAGTAGAACGAGGGTC   | 101           |  |

<sup>1</sup><https://www.ncbi.nlm.nih.gov/gene/>

<sup>2</sup> <https://pga.mgh.harvard.edu/primerbank/index.html>

**Table S5. siRNA**

| <b>siRNAs</b> |                     |                                            |                                          |
|---------------|---------------------|--------------------------------------------|------------------------------------------|
| gene symbol   | siRNA designation   | chromosome location                        | source                                   |
| CEACAM6       | s9283               | Chr.19: 41755421 - 41772211 (Build GRCh38) | ThermoFisher ( <a href="#">4392420</a> ) |
| CEACAM5       | s2887               | Chr.19: 41708585 - 41730433 (Build GRCh38) | ThermoFisher ( <a href="#">4392420</a> ) |
| -             | negative control #2 | none                                       | ThermoFisher ( <a href="#">4390846</a> ) |

**Table S6.** antibodies

| <b>antibodies</b>                                                                                                                |                    |                                                                                                  |                                                         |
|----------------------------------------------------------------------------------------------------------------------------------|--------------------|--------------------------------------------------------------------------------------------------|---------------------------------------------------------|
| <b>CEACAM-specific antibodies</b>                                                                                                |                    |                                                                                                  |                                                         |
| Antibody                                                                                                                         | Specificity        | description                                                                                      | source/reference                                        |
| B3-17                                                                                                                            | CEACAM1            | a-human CEACAM1, mouse monoclonal                                                                | (12)                                                    |
| 308/3-3                                                                                                                          | CEACAM3,5          | a-human CEACAM3,5, mouse monoclonal                                                              | Sigma, <a href="#">MABT326</a>                          |
| A0115                                                                                                                            | CEACAM/CEA         | a-human Carcinoembryonic Antigen (CEA), polyclonal Rabbit                                        | DAKO, A0115                                             |
| M1545                                                                                                                            | CD66e (CEA)        | a-human CD66e mouse monoclonal                                                                   | PeliCluster                                             |
| 5C8C4                                                                                                                            | CEACAM5            | a-human CEACAM5, mouse monoclonal                                                                | (12)                                                    |
| 1H7-H4B                                                                                                                          | CEACAM6            | a-human CEACAM6, mouse monoclonal                                                                | (12)                                                    |
| 6/40c                                                                                                                            | CEACAM8            | a-human CEACAM8, mouse monoclonal                                                                | (13)                                                    |
| <b>ETEC H10407-specific (serotype O78,H11)</b>                                                                                   |                    |                                                                                                  |                                                         |
| a-O78                                                                                                                            | O78 polysaccharide | a O78 polysaccharide rabbit polyclonal, cross-absorbed                                           | Penn State <i>E. coli</i> Reference Center <sup>b</sup> |
| <b>secondary antibodies</b>                                                                                                      |                    |                                                                                                  |                                                         |
| Antibody                                                                                                                         | Specificity        | description                                                                                      | source/reference                                        |
| <a href="#">AB_2338586</a> <sup>a</sup>                                                                                          | mouse IgG (H+L)    | Goat- a mouse Fab, biotin-SP (long spacer), affinity purified                                    | Jackson ImmunoResearch ( <a href="#">115-067-003</a> )  |
| <a href="#">A-11070</a>                                                                                                          | rabbit IgG (H+L)   | F(ab') <sub>2</sub> -Goat a-Rabbit IgG (H+L) Cross-Adsorbed Secondary Antibody, Alexa Fluor 488  | ThermoFisher                                            |
| <a href="#">A-11032</a>                                                                                                          | mouse IgG (H+L)    | Goat a-Mouse IgG (H+L) Highly Cross-Adsorbed Secondary Antibody, Alexa Fluor 594                 | ThermoFisher                                            |
| <a href="#">A-11072</a>                                                                                                          | rabbit IgG (H+L)   | F(ab') <sub>2</sub> -Goat a -Rabbit IgG (H+L) Cross-Adsorbed Secondary Antibody, Alexa Fluor 594 | ThermoFisher                                            |
| <a href="#">A-11029</a>                                                                                                          | mouse IgG (H+L)    | Goat a -Mouse IgG (H+L) Highly Cross-Adsorbed Secondary Antibody, Alexa Fluor 488                | ThermoFisher                                            |
| <sup>a</sup> Resource Identification Portal at <a href="https://scicrunch.org/resources">https://scicrunch.org/resources</a>     |                    |                                                                                                  |                                                         |
| <sup>b</sup> <a href="https://foodscience.psu.edu/research/centers/ecoli">https://foodscience.psu.edu/research/centers/ecoli</a> |                    |                                                                                                  |                                                         |

**Table S7. original image files**

| links to original image files*                                               |                                                                                                                   |                                                                                         |
|------------------------------------------------------------------------------|-------------------------------------------------------------------------------------------------------------------|-----------------------------------------------------------------------------------------|
| image name                                                                   | description                                                                                                       | DOI†                                                                                    |
| figure 1c                                                                    | immunoblots                                                                                                       | 10.6084/m9.figshare.12137544                                                            |
| figure 2a                                                                    | immunoblots of CEACAM6 and CEACAM5 in Caco-2 and G2 (CRISPR-Cas9 engineered CEACAM6 <sup>-/-</sup> cells)         | 10.6084/m9.figshare.12141033                                                            |
| figure 3a-c                                                                  | immunoblots of FimH-CEACAM6 molecular interactions                                                                | 10.6084/m9.figshare.12141228                                                            |
| figure 4a                                                                    | TEM, CEACAM6 enteroid immunogold                                                                                  | 10.6084/m9.figshare.12137658                                                            |
| figure 4b                                                                    | TEM, CEACAM6 enteroid immunogold                                                                                  | 10.6084/m9.figshare.12137652                                                            |
| figure 4d                                                                    | confocal images of ETEC on polarized small intestinal enteroids in context of CEACAM6 expression                  | 10.6084/m9.figshare.12137655                                                            |
| figure 4f.                                                                   | immunoblots of small intestinal enteroids treated with LT vs control untreated cells. three technical replicates. | 10.6084/m9.figshare.12141138                                                            |
| figure 4h                                                                    | immunoblot                                                                                                        | <a href="https://doi.org/10.6084/m9.figshare.12137661">10.6084/m9.figshare.12137661</a> |
| figure 4i                                                                    | immunohistochemistry for CEACAM6 in infected intestinal sections                                                  | 10.6084/m9.figshare.12138297                                                            |
| supplemental figure 4b                                                       | immunoblots of CEACAM5,6 expression following CEACAM5 siRNA treatment                                             | 10.6084/m9.figshare.12142092                                                            |
| supplemental figure 5a                                                       | immunoblot of CEACAM5 expression following LT induction of small intestinal enteroids                             | 10.6084/m9.figshare.12140994                                                            |
| *deposited at figshare.com † <a href="https://doi.org/">https://doi.org/</a> |                                                                                                                   |                                                                                         |

## SI references

1. S. D. Gray-Owen, R. S. Blumberg, CEACAM1: contact-dependent control of immunity. *Nat Rev Immunol* **6**, 433-446 (2006).
2. L. Fagerberg *et al.*, Analysis of the human tissue-specific expression by genome-wide integration of transcriptomics and antibody-based proteomics. *Mol Cell Proteomics* **13**, 397-406 (2014).
3. M. Sadarangani, A. J. Pollard, S. D. Gray-Owen, Opa proteins and CEACAMs: pathways of immune engagement for pathogenic *Neisseria*. *FEMS Microbiol Rev* **35**, 498-514 (2011).
4. D. G. Evans, R. P. Silver, D. J. Evans, Jr., D. G. Chase, S. L. Gorbach, Plasmid-controlled colonization factor associated with virulence in *Escherichia coli* enterotoxigenic for humans. *Infect Immun* **12**, 656-667 (1975).
5. D. J. Evans, Jr., D. G. Evans, Three characteristics associated with enterotoxigenic *Escherichia coli* isolated from man. *Infect Immun* **8**, 322-328 (1973).
6. F. C. Dorsey, J. F. Fischer, J. M. Fleckenstein, Directed delivery of heat-labile enterotoxin by enterotoxigenic *Escherichia coli*. *Cell Microbiol* **8**, 1516-1527 (2006).
7. R. Zhang *et al.*, Mxra8 is a receptor for multiple arthritogenic alphaviruses. *Nature* **557**, 570-574 (2018).
8. N. E. Sanjana, O. Shalem, F. Zhang, Improved vectors and genome-wide libraries for CRISPR screening. *Nat Methods* **11**, 783-784 (2014).
9. A. Sheikh *et al.*, Highly conserved type 1 pili promote enterotoxigenic *E. coli* pathogen-host interactions. *PLoS Negl Trop Dis* **11**, e0005586 (2017).
10. B. B. Singer *et al.*, Dereglulation of the CEACAM expression pattern causes undifferentiated cell growth in human lung adenocarcinoma cells. *PLoS One* **5**, e8747 (2010).
11. P. Kumar *et al.*, Enterotoxigenic *Escherichia coli*-blood group A interactions intensify diarrheal severity. *J Clin Invest* **128**, 3298-3311 (2018).
12. H. T. Muturi *et al.*, Tumor and endothelial cell-derived microvesicles carry distinct CEACAMs and influence T-cell behavior. *PLoS One* **8**, e74654 (2013).
13. B. B. Singer *et al.*, Soluble CEACAM8 interacts with CEACAM1 inhibiting TLR2-triggered immune responses. *PLoS One* **9**, e94106 (2014).
